# Supplementary material
Source: PubMed Central journal article supplement (PMC3811602)
Supplement: JB.00837-13_zjb999092890so1.pdf [file JB.00837-13_zjb999092890so1.pdf]

Table S1 Primer sequences

| Primer name                           | Sequence                                     |
|---------------------------------------|----------------------------------------------|
| <b>For promoter deletion analysis</b> |                                              |
| <i>tynA5-1</i>                        | 5' - TAATCGGTGAATGAAGGGCA                    |
| <i>tynA5-2</i>                        | 5' - GCATCCACTGTATGAAAAGC                    |
| <i>tynA5-3</i>                        | 5' - TGTATGAAAAGCTGGCACAC                    |
| <i>tynA5-4</i>                        | 5' - TATGAAAAGCTGGCACACCT                    |
| <i>tynA5-5</i>                        | 5' - AGCTGGCACACCTGCCAAAC                    |
| <i>tynA5-6</i>                        | 5' - GCTGGCACACCTGCCAAACA                    |
| <i>tynA5-7</i>                        | 5' - GGCACACCTGCCAAACAACC                    |
| <i>tynA5-8</i>                        | 5' - ACACCTGCCAAACAACCTGG                    |
| <i>tynA-3</i>                         | 5' - (GGATCC) GCTTCCCATTATTAACCTCG           |
| <i>feaB5-1</i>                        | 5' - AGCAGAGTGCGTGGCAAAAG                    |
| <i>feaB5-2</i>                        | 5' - CACTGCGGGGTTTCATGGCAC                   |
| <i>feaB5-3</i>                        | 5' - TTGTCACGATTTGCGGAGCT                    |
| <i>feaB5-4</i>                        | 5' - CGGAGCTTGTTCACAGCTGAC                   |
| <i>feaB5-5</i>                        | 5' - TGTCACAGCTGACAAAGCGA                    |
| <i>feaB5-6</i>                        | 5' - AAGCGAATGTCACAGCGAAA                    |
| <i>feaB5-7</i>                        | 5' - CAGCGAAAAAAGTGACTTTT                    |
| <i>feaB-3</i>                         | 5' - (GGATCC) CTCTGTCATCACTTTTCCTT           |
| <b>For site-directed mutagenesis</b>  |                                              |
| <i>tynA-C10G</i>                      | 5' - GAAAAGCTGGCAGACCTGCCAAACAACCTGGCAGGTGC  |
| <i>tynA-C10Gr</i>                     | 5' - GCACCTGCCAGGTTGTTTGGCAGGTCTGCCAGCTTTTC  |
| <i>tynA-A11T</i>                      | 5' - GAAAAGCTGGCACTCCTGCCAAACAACCTGGCAGGTGC  |
| <i>tynA-A11Tr</i>                     | 5' - GCACCTGCCAGGTTGTTTGGCAGGAGTGCCAGCTTTTC  |
| <i>tynA-T14G</i>                      | 5' - GAAAAGCTGGCACACCGGCCAAACAACCTGGCAGGTGC  |
| <i>tynA-T14Gr</i>                     | 5' - GCACCTGCCAGGTTGTTTGGCCGGTGTGCCAGCTTTTC  |
| <i>tynA-G15T</i>                      | 5' - GAAAAGCTGGCACACCTTCCAACAACCTGGCAGGTGC   |
| <i>tynA-G15Tr</i>                     | 5' - GCACCTGCCAGGTTGTTTGGAAAGGTGTGCCAGCTTTTC |
| <i>tynA-C16A</i>                      | 5' - GAAAAGCTGGCACACCTGACAAACAACCTGGCAGGTGC  |
| <i>tynA-C16A r</i>                    | 5' - GCACCTGCCAGGTTGTTTGTTCAGGTGTGCCAGCTTTTC |
| <i>tynA-C17T</i>                      | 5' - GAAAAGCTGGCACACCTGCTAAACAACCTGGCAGGTGC  |
| <i>tynA-C17Ar</i>                     | 5' - GCACCTGCCAGGTTGTTTGTTCAGGTGTGCCAGCTTTTC |
| <i>tynA-A18C</i>                      | 5' - GAAAAGCTGGCACACCTGCCCAACAACCTGGCAGGTGC  |
| <i>tynA-A18Cr</i>                     | 5' - GCACCTGCCAGGTTGTTGGGCAGGTGTGCCAGCTTTTC  |
| <i>tynA-A19C</i>                      | 5' - GAAAAGCTGGCACACCTGCCACACAACCTGGCAGGTGC  |
| <i>tynA-A19Cr</i>                     | 5' - GCACCTGCCAGGTTGTGTGGCAGGTGTGCCAGCTTTTC  |
| <i>tynA-G27T</i>                      | 5' - GAAAAGCTGGCACACCTGCCAAACAACCTTGCAGGTGC  |
| <i>tynA-G27Tr</i>                     | 5' - GCACCTGCAAGGTTGTTTGGCAGGTGTGCCAGCTTTTC  |
| <i>tynA-A30G</i>                      | 5' - GAAAAGCTGGCACACCTGCCAAACAACCTGGCCGGTGC  |
| <i>tynA-A30Gr</i>                     | 5' - GCACCGGCCAGGTTGTTTGGCAGGTGTGCCAGCTTTTC  |

|                   |                                            |
|-------------------|--------------------------------------------|
| <i>tynA-G31A</i>  | 5' -GAAAAGCTGGCACACCTGCCAAACAACCTGGCAAGTGC |
| <i>tynA-G31Ar</i> | 5' -GCACTTGCCAGGTTGTTTGGCAGGTGTGCCAGCTTTTC |
| <i>tynA-T33A</i>  | 5' -GAAAAGCTGGCACACCTGCCAAACAACCTGGCAGGAGC |
| <i>tynA-T33Ar</i> | 5' -GCTCCTGCCAGGTTGTTTGGCAGGTGTGCCAGCTTTTC |
| <i>tynA-G38C</i>  | 5' -GAAAAGCTGGCACACCTGCCAAACAACCTGGCAGGTCC |
| <i>tynA-G38Cr</i> | 5' -GGACCTGCCAGGTTGTTTGGCAGGTGTGCCAGCTTTTC |

**For RACE**

|                |                             |
|----------------|-----------------------------|
| <i>tynA-A1</i> | 5' -AGGGTAAAGAGCTGGGCGTA    |
| <i>tynA-A2</i> | 5' -TGCACATCGGCACCAAATTC    |
| <i>tynA-S1</i> | 5' -GCAATTGTTAATGGTCAGCC    |
| <i>tynA-S2</i> | 5' -GACAATAAAGCCTGGGTTTC    |
| <i>tynA-RT</i> | 5' - (phos) TTCGTCCGCAGTTAG |
| <i>feaB-A1</i> | 5' -GTTACGCTCTGCGGGTAAT     |
| <i>feaB-A2</i> | 5' -TTCGTTGGCATCAGCAGTAG    |
| <i>feaB-S1</i> | 5' -TGATCTGGTGGAGCAGCACA    |
| <i>feaB-S2</i> | 5' -AACTGGAAACCCTGGAGCAA    |
| <i>feaB-RT</i> | 5' - (phos) CAAGTCCAGCGTTTT |
| <i>feaR-A1</i> | 5' -GCCAGGTGCGGGATAAATTC    |
| <i>feaR-A2</i> | 5' -CTGGTTGTACGGTACTCAG     |
| <i>feaR-S1</i> | 5' -CAGCTTAGTGGTCAGGCAAT    |
| <i>feaR-S2</i> | 5' -CAGATTGGCGCTGGCGATAT    |
| <i>feaR-RT</i> | 5' - (phos) AGAAAGTGCCGGATT |

**For CTDhis purification**

|                 |                                    |
|-----------------|------------------------------------|
| <i>CTDhis5'</i> | 5' - (CAT) ATGAACCCCGCAGTGGATAA    |
| <i>CTDhis3'</i> | 5' - (CTCGAG) GCGGAATTTACGTCGATACT |

**For FeaR CTD and full length FeaR over-expression**

|               |                                       |
|---------------|---------------------------------------|
| <i>CTD5'</i>  | 5' - (GAATTCACCATG) AACCCCGCAGTGGATAA |
| <i>CTD3'</i>  | 5' - (TCTAGA) TTAGCGGAATTTACGTCGATACT |
| <i>feaR5'</i> | 5' - (GAATTCACC) ATGCGGGAATCTGTTCAACC |
| <i>feaR3'</i> | 5' - (TCTAGA) TTAGCGGAATTTACGTCGATACT |

**For EMSA**

|               |                                     |
|---------------|-------------------------------------|
| <i>tynA5'</i> | 5' - (biotin) TAATCGGTGAATGAAGGGCA  |
| <i>tynA3'</i> | 5' -TATTAACCTCGTCAGATGTTG           |
| <i>ytfE5'</i> | 5' - (biotin) GTTTGCTGTACACCTTTTTTA |
| <i>ytfE3'</i> | 5' -AGCTGATACCTCATTCTTAA            |

Table S2 *E. coli* strains and plasmids

| Strain or plasmid             | Genotype                               | Reference or source  |
|-------------------------------|----------------------------------------|----------------------|
| <b><i>E. coli</i> strains</b> |                                        |                      |
| MG1655                        | <i>rph-1 E. coli</i>                   | Genetic Stock Center |
| JOEY270                       | MG1655 $\Delta lacZ$                   | (8)                  |
| JOEY796                       | JOEY270 $\lambda feaR-lacZ$            | This work            |
| JOEY271                       | JOEY270 $\lambda tynA-lacZ$            | (8)                  |
| JOEY272                       | JOEY270 $\lambda feaB-lacZ$            | (8)                  |
| JW1379                        | BW25113 <i>feaR::kan</i>               | Keio library         |
| JOEY797                       | JOEY 270 $\lambda feaR-lacZ feaR::kan$ | This work            |
| JOEY448                       | JOEY 270 $\lambda tynA-lacZ feaR::kan$ | (8)                  |
| JOEY449                       | JOEY 270 $\lambda feaB-lacZ feaR::kan$ | (8)                  |
|                               | BW25113 <i>glnG::kan</i>               | Keio library         |
|                               | BW25113 <i>nac::kan</i>                | Keio library         |
| JOEY801                       | JOEY796 <i>glnG::kan</i>               | This work            |
| JOEY802                       | JOEY796 <i>nac::kan</i>                | This work            |
| JOEY623                       | JOEY270 <i>tynA5-1-lacZ</i>            | This work            |
| JOEY719                       | JOEY270 <i>tynA5-2-lacZ</i>            | This work            |
| JOEY745                       | JOEY270 <i>tynA5-3-lacZ</i>            | This work            |
| JOEY746                       | JOEY270 <i>tynA5-4-lacZ</i>            | This work            |
| JOEY625                       | JOEY270 <i>tynA5-5-lacZ</i>            | This work            |
| JOEY747                       | JOEY270 <i>tynA5-6-lacZ</i>            | This work            |
| JOEY748                       | JOEY270 <i>tynA5-7-lacZ</i>            | This work            |
| JOEY749                       | JOEY270 <i>tynA5-8-lacZ</i>            | This work            |
| JOEY751                       | JOEY270 <i>feaB5-1-lacZ</i>            | This work            |
| JOEY752                       | JOEY270 <i>feaB5-2-lacZ</i>            | This work            |
| JOEY753                       | JOEY270 <i>feaB5-3-lacZ</i>            | This work            |
| JOEY754                       | JOEY270 <i>feaB5-4-lacZ</i>            | This work            |
| JOEY755                       | JOEY270 <i>feaB5-5-lacZ</i>            | This work            |
| JOEY756                       | JOEY270 <i>feaB5-6-lacZ</i>            | This work            |
| JOEY757                       | JOEY270 <i>feaB5-7-lacZ</i>            | This work            |
| JOEY720                       | JOEY270 <i>tynA-C10G-lacZ</i>          | This work            |
| JOEY721                       | JOEY270 <i>tynA-A11T-lacZ</i>          | This work            |
| JOEY669                       | JOEY270 <i>tynA-T14G-lacZ</i>          | This work            |
| JOEY722                       | JOEY270 <i>tynA-G15T-lacZ</i>          | This work            |
| JOEY670                       | JOEY270 <i>tynA-C16A-lacZ</i>          | This work            |
| JOEY724                       | JOEY270 <i>tynA-C17T-lacZ</i>          | This work            |
| JOEY671                       | JOEY270 <i>tynA-C17A-lacZ</i>          | This work            |
| JOEY725                       | JOEY270 <i>tynA-A18C-lacZ</i>          | This work            |
| JOEY672                       | JOEY270 <i>tynA-A19C-lacZ</i>          | This work            |
| JOEY673                       | JOEY270 <i>tynA-G27T-lacZ</i>          | This work            |
| JOEY675                       | JOEY270 <i>tynA-A30G-lacZ</i>          | This work            |
| JOEY726                       | JOEY270 <i>tynA-G31A-lacZ</i>          | This work            |
| JOEY726                       | JOEY270 <i>tynA-T33A-lacZ</i>          | This work            |
| JOEY728                       | JOEY270 <i>tynA-G38C-lacZ</i>          | This work            |

**Plasmids**

|                     |                                                                      |           |
|---------------------|----------------------------------------------------------------------|-----------|
| pRS415              |                                                                      | (23)      |
| pSTBlue-1           |                                                                      | Novagen   |
| pET21a              |                                                                      | Novagen   |
| pET21a-CTDhis       | <i>feaR-CTD</i> , hexa His-tag at the C-terminus, cloned into pET21a | This work |
| pBAD24              |                                                                      | (25)      |
| pBAD24-CTD          | <i>feaR-CTD</i> , cloned into pBAD24                                 | This work |
| pBAD24-CTDhis       | <i>feaR-CTD</i> , hexa His-tag at the C-terminus, cloned into pBAD24 | This work |
| pBAD24- <i>feaR</i> | <i>feaR</i> , cloned into pBAD24                                     | This work |

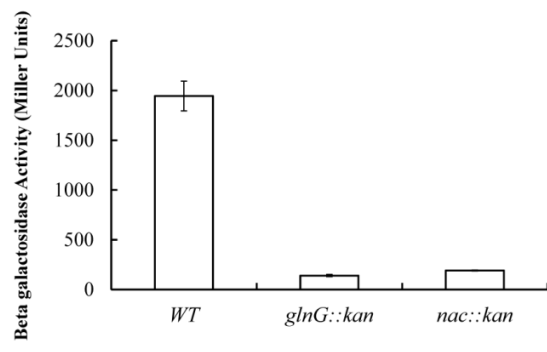

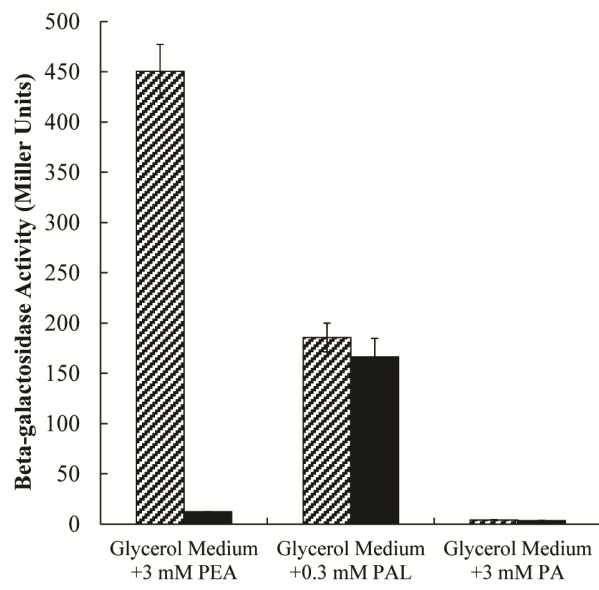

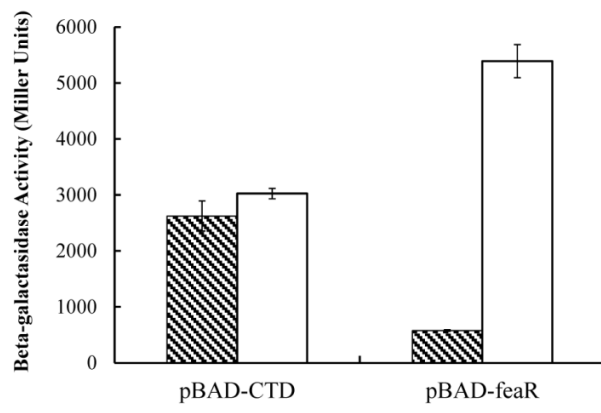

**Figure S1.** Regulation of *feaR* by NAC. Strains containing the *feaR-lacZ* fusion and *ntrC* (*glnG*) and *nac* mutations were cultured in glutamine medium. Activities are the means of duplicate measurements from each of three independent cultures, error bars are standard deviations.

**Figure S2.** Activation of the *tynA* promoter requires TynA activity. Strains containing a *tynA-lacZ* fusion (stripped bars) along with a *tynA* mutation (black bars) were cultured in glycerol medium supplemented with PEA, phenylacetaldehyde (PAL), or phenylacetate (PA). Activities are the means of duplicate measurements from each of three independent cultures, error bars are standard deviations. For cells growing in glycerol medium supplemented with PAL, we solubilized PAL in DMSO (to 0.3 M) and then added PAL to the medium to a final concentration of 0.1 mM before inoculation. Two further additions of 0.1 mM PAL were made at 2 hour intervals during growth, prior to sampling of the culture for  $\beta$ -galactosidase assay.

**Figure S3.** Induction of *tynA* by the FeaR CTD and full-length FeaR *in vivo*. The CTD and FeaR were expressed from pBAD24, in a *tynA-lacZ* reporter strain. Activity of the *tynA* promoter was measured in the absence (striped bars) and presence (open bars) of PEA. Activities are the means of duplicate measurements from each of three independent cultures, error bars are standard deviations.
